# Transcriptional fluctuations govern the serum dependent cell cycle duration heterogeneities in Mammalian cells

Vinodhini Govindaraj<sup>1</sup>, Subrot Sarma<sup>1</sup>, Atharva Karulkar<sup>2</sup>, Rahul Purwar<sup>\*2</sup> and Sandip Kar<sup>\*1</sup>

<sup>1</sup>Department of Chemistry, IIT Bombay, Powai, Mumbai 400076, India

<sup>2</sup>Department of Biosciences and Bioengineering, IIT Bombay, Powai, Mumbai 400076, India

\*E-mail: [sandipkar@iitb.ac.in](mailto:sandipkar@iitb.ac.in)

## Abstract

Mammalian cells exhibit a high degree of intercellular variability in cell cycle period and phase durations. However, the factors orchestrating the cell cycle duration heterogeneities remain unclear. Herein, by combining cell cycle network-based mathematical models with live single-cell imaging studies under varied serum conditions, we demonstrate that fluctuating transcription rates of cell cycle regulatory genes across cell lineages and during cell cycle progression in mammalian cells majorly govern the robust correlation patterns of cell cycle period and phase durations among sister, cousin, and mother-daughter lineage pairs. However, for the overall cellular population, alteration in serum level modulates the fluctuation and correlation patterns of cell cycle period and phase durations in a correlated manner. These heterogeneities at the population level can be fine-tuned under limited serum conditions by perturbing the cell cycle network using a p38-signaling inhibitor without affecting the robust lineage level correlations. Overall, our approach identifies transcriptional fluctuations as the key controlling factor for the cell cycle duration heterogeneities, and predicts ways to reduce cell-to-cell variabilities by perturbing the cell cycle network regulations.

**Keywords:** Cell cycle duration variabilities, live-cell imaging, transcriptional fluctuation mathematical and computational modeling

\* Corresponding authors

## **Significance statement**

In malignant tumors, cells display a diverse pattern in cell division time. This cell-to-cell variability in cell cycle duration had been observed even under culture conditions for various mammalian cells. Here we used live-cell imaging studies to monitor FUCCI-HeLa cells and quantified the cell cycle period and time spent in different phases under varied serum conditions. We proposed a set of stochastic cell cycle network-based mathematical models to investigate the live-cell imaging data and unraveled that the transcription rate variation across cell lineages and during cell cycle phases explains every aspect of the cell cycle duration variabilities. Our models identified how different deterministic effects and stochastic fluctuations control these variabilities and predicted ways to alter these cell cycle duration variabilities.

## Introduction

Cell cycle period and phase durations of mammalian cells demonstrate a high degree of heterogeneity under culture conditions (1–9), and within a tumor micro-environment (10, 11). Often, such heterogeneities significantly influence the cell-fate decision-making (12–16). This means that these heterogeneities can be fine-tuned to design better therapeutics if the factors controlling these variabilities are known precisely. However, identifying these controlling factors is highly challenging due to the diverse and complex nature of cell cycle duration heterogeneities. For example, The cell cycle phase durations quantified at the single-cell level in proliferating lymphocytes (8, 17) using FUCCI-reporter (18) showed a highly variable S-G<sub>2</sub>-M time with strongly correlated G<sub>1</sub> timings in the sibling cell pairs. A highly correlated cell cycle in sibling pairs has been observed in other mammalian cell types as well (19–22) with mothers and daughters having poor correlation in cell cycle timings, while cousins showing a significant correlation for the same (19–22). These observations are quite generic and cell-type independent, however, the precise understanding of the nature and origin of these heterogeneities remains elusive.

To understand such complex inheritance patterns of cell cycle durations in cell lineages, different kinds of mathematical modeling studies were employed. The model based on transition probability by Dowling et al. assumed that cells transit from one cell cycle phase to another randomly, and consequently create no/poor correlation in mother-daughter pairs (17). However, the cell cycle period of siblings are correlated as cells spent an equal proportion of division time in S-G<sub>2</sub>-M phases (17). A ‘kicked cell cycle model’ proposed by Sandler et al. considered that another oscillator like the circadian clock eventually influences cell cycle durations and causes the observed correlation pattern in cell lineages (20). Recent models using bifurcating autoregressive (BAR) approach suggest that the inheritance of more than one deterministic factor account for the observed correlation pattern in cell lineages (21, 22). It was evident that these modeling studies came up with a widely varied qualitative explanation for the inheritance pattern. However, none of these studies considered the well-established cell cycle gene-interaction network which dynamically controls the cell cycle progression and the associated variabilities (23, 24) within the cell lineages and even at the overall cellular population level. It can be envisaged that an appropriate network-based stochastic cell cycle model will provide the opportunity to identify the effect of various kinds of noise sources like, (i) intrinsic noise due to gene expression variabilities (25–27), (ii) extrinsic noises due to cell to cell variability in the transcription rates of cell cycle

related genes within different lineages (28–32), epigenetic modifications during the cell cycle (33–36), random partitioning of molecules during cell division (23, 24), etc., and (iii) even the deterministic factors that ultimately orchestrate the cell cycle duration heterogeneities and the inheritance pattern.

Moreover, in most of the previous single-cell studies (20–22), the heterogeneities in cell cycle duration have been quantified for a healthy growing condition. However, the cell cycle durations are known to get altered due to changes in the growth environment (17, 19), and in malignant tumors, the cells continue to proliferate even under minimal growth condition (7, 37). This suggests that the cell cycle durations and the corresponding heterogeneities associated with it may change according to the serum level. Earlier, it was shown that for a specific growth condition, most of the cell cycle period variation happens due to  $G_1$ -phase duration variability while S- $G_2$ -M time remains relatively constant (38), while recent studies demonstrate that even S- $G_2$ -M phase duration can also be highly variable (17). However, the exact nature and to what extent the serum level influences the cell cycle duration heterogeneities, remain unresolved. In this article, we take a system biology approach to unravel how the change in serum level simultaneously modifies the heterogeneities of the cell cycle phase durations and inheritance pattern among the cell lineage pairs and for the overall cellular population under culture conditions. Our proposed network-based stochastic cell cycle model allowed us to address these pertinent questions; (i) Which is the factor that influentially governs the correlation pattern of cell cycle period and phase durations for cell lineage pairs under different serum conditions? (ii) Which noise source (Intrinsic or Extrinsic) majorly controls the variance of the cell cycle period and phase duration distributions? (iii) How do serum levels alter the fluctuation and correlation patterns of cell cycle period and phase durations for the overall cellular population? and (iv) Can we fine-tune these cell cycle period and phase duration heterogeneities for the overall cellular population to attain a therapeutically advantageous situation?

To answer these questions, we quantified the intercellular variability and lineage correlations in cell cycle period and phase durations from single-cell imaging data and investigated the origin of these variabilities and correlations using our network-based stochastic cell cycle model. Live-cell imaging of FUCCI-HeLa cells under different serum conditions depict that the variabilities and correlations observed in cell cycle and phase durations can be modulated in a serum-dependent manner. Our modeling study reconciled the experimental data and demonstrated

that cell-to-cell variability in transcription propensities of the cell cycle regulatory genes is one of the major sources of variability in cell cycle period and phase durations. It further revealed that the memory of transcriptional activity in cell lineages leads to the correlation pattern observed in mother-daughter, sibling, and cousin pairs under varied serum conditions. Finally, we showed that it is possible to fine-tune the heterogeneities of cell cycle period and phase durations under a specific serum level without altering the inheritance pattern by just altering specific gene expression via inhibition of the p38-signaling (39, 40) pathway.

## Results:

### Alteration in serum level influences the cell cycle period and phase duration heterogeneities

To investigate cell cycle progression at the single-cell level, we produced FUCCI (18) expressing stable HeLa cell-line (FUCCI-HeLa, **Materials and Methods**) to precisely quantify the cell cycle period and phase durations (**Fig. 1a**). We performed live-cell imaging studies with FUCCI-HeLa cells under two different serum concentrations 2% (low, **Movie S1** and **Movie S2**, **Fig. 1b**) and 10% (high, **Movie S3** and **Movie S4**, **Fig. 1c**) and measured the cell cycle period ( $T_{CC}$ ), and phase duration ( $T_{G1}$  &  $T_{S-G2-M}$ ) distributions by following FUCCI reporter trajectories from several single cells (**Fig. 1d-e**) (details in **Materials and Methods**). To calculate the statistics for  $T_{CC}$ ,  $T_{G1}$  &  $T_{S-G2-M}$  timings, we only considered those cells which completed their cell cycle during the imaging period. We observed across different replicates (**Table S1**) that cells exhibit a longer  $G_1$  and cell cycle mean durations for 2% serum (**Fig. 1d**, **Fig. S1**, and **Table S1**) in comparison to 10% serum condition (**Fig. 1e**, **Fig. S1**, and **Table S1**), while the mean S-G<sub>2</sub>-M duration shows a slight increase or no perceptible change (**Table S1**) under 10% serum concentration (**Fig. 1d-1e**). While  $T_{G1}$  variability remains higher than  $T_{S-G2-M}$  variability under both the serum conditions, the mean CV (coefficient of variation) of  $T_{G1}$  and  $T_{CC}$  duration decreases, and  $T_{S-G2-M}$  increases at 10% serum compared to 2% serum (**Fig. 1f** and **Table S1**).

Thus, one can presume that the  $T_{G1}$  and  $T_{S-G2-M}$  are mutually adjusting in a correlated manner during the cell cycle progression. However, the  $T_{G1}$  and  $T_{S-G2-M}$  showed poor correlation under both serum conditions (**Fig. 1g-1h** and **Fig. S1**). This indicates that the phase durations do not mutually influence each other i.e. a shorter  $T_{G1}$  does not cause a longer  $T_{S-G2-M}$  or vice versa, which had been previously reported as well (42). Interestingly, our experiments revealed that under a 2% serum condition,  $T_{CC}$  correlates to a higher extent with  $T_{G1}$  in comparison to  $T_{S-G2-M}$  (**Fig.**

**1g).** This confirms that  $T_{G1}$  being highly variable (**Fig. 1d**) indeed greatly influences the  $T_{CC}$  at 2% serum condition.

However, higher serum concentration (10%) decreases the  $T_{CC}$  vs  $T_{G1}$  correlation and increases the  $T_{CC}$  vs  $T_{S-G2-M}$  correlation (**Fig. 1h**) suggesting that  $T_{S-G2-M}$  variability dictates the  $T_{CC}$  variability at 10% serum, even though the magnitude of  $T_{G1}$  variability is higher than the corresponding  $T_{S-G2-M}$  variability (**Fig. 1e**). These observations state that variations in serum condition modulate the  $T_{CC}$ ,  $T_{G1}$ , and  $T_{S-G2-M}$  heterogeneities in a specific manner at the population level.

### **Cells within a subpopulation and in cell lineages show distinct cell cycle period and phase duration pattern**

Often, a population-level cellular response can be influenced by a subpopulation of cells with distinct behaviour (43, 44). To investigate this aspect, we have divided the cellular population into two subpopulations based on the average  $T_{CC}$  (**Fig. S2A**) to understand the contribution of the slow and fast cycling cells in the observed correlation pattern between  $T_{CC}$  vs  $T_{G1}$  and  $T_{CC}$  vs  $T_{S-G2-M}$  under varied serum conditions. We find that under low serum (2%) conditions, both fast and slow-cycling cells have a high  $T_{CC}$  vs  $T_{G1}$  correlation (**Fig. 1i** and **Fig.S2b**). However, at 10% serum condition, slow-cycling cells have an increased  $T_{CC}$  vs  $T_{S-G2-M}$  correlation than the fast-cycling cells (**Fig. 1j** and **Fig.S2b**). This indicates that slow-cycling cells cause the higher  $T_{CC}$  vs  $T_{S-G2-M}$  correlation for the overall cellular population at 10% serum. Further, we analyze this continuously dividing the cellular population by following the cells over specific cell lineages which eventually produces subpopulations of mother-daughter, sister-sister, and cousin-cousin pairs. Previous studies had demonstrated that mother-daughter, sister-sister, and cousin-cousin pairs show distinct correlation patterns of cell cycle period and phase durations (17, 19–22). We examined similar subpopulations and observed that on an average mother cell population had a faster cycling time than the daughter population under both 2% and 10% serum levels (**Fig. 1k-1l**) with poor correlation in  $T_{CC}$  and phase timings between mother and daughter pairs (**Fig. 1m-1n**). We observed a highly correlated  $T_{CC}$  among sister pairs (**Fig. 1m-1n**) with a comparatively higher correlation in  $T_{G1}$  than  $T_{S-G2-M}$  (17, 19–22). This suggests that the sister cells execute the  $G_1$ -phase in a coordinated manner than the  $S-G_2-M$  phase, where the phase duration could get altered among the sister cells due to various reasons. Cousin pairs showed a moderate level of correlation which

was in between the sisters and mother-daughter pairs (**Fig. 1m-1n**). Importantly, serum level does not affect the  $T_{CC}$ ,  $T_{G1}$ , and  $T_{S-G2-M}$  correlations in sisters, cousins, and mother-daughter pairs significantly (**Fig. 1m-1n**). However, it was hard to disentangle the underlying factors which critically govern such kind of fluctuation and correlation patterns under different serum conditions explicitly by only analyzing these experimental observations.

### **A stochastic cell cycle model to analyze the serum dependent cell cycle period and phase duration heterogeneities**

Over the years, many cell cycle models (45–52) have been developed to address different aspects of mammalian cell-cycle regulations in a context-dependent manner. In a similar spirit, we developed a minimalistic cell cycle network-based (**Fig. 2a**) mathematical model (**Table S2**) to investigate the origin of heterogeneities observed under different serum conditions. The model (**Fig. 2a**) includes three different modules which consist of regulatory interactions controlling different phases of the cell cycle to generate a cycling cell. The first module (**Module-I, Fig. 2a, and Fig. S3**) depicts the early  $G_1$  phase regulation along with the restriction point control mechanism that organizes the decision-making for the cell cycle commitment by sensing the serum level (53, 54). This module contains serum-mediated Myc and CycD activation that initiates the phosphorylation of Rb protein by the Cyclin-dependent kinase (CDK) complex Cdk1-CycD to partially activate the transcription factor E2F1. The second module (**Module-II, Fig. 2a, and Fig. S3**) delineates the molecular events controlling the  $G_1$ -S transition and the S-phase activities which primarily depend on the two important Cyclin-dependent kinase regulators, CDK2-CycE and CDK2-CycA. These CDK-cyclin complexes overcome the inhibitions by the Cyclin-dependent kinase inhibitors (CKI's in the form of p21 and p27) and Cdh1 to help the cells cross the restriction point by complete activation of E2F1 which coordinates the  $G_1$ -S transition and active S-phase related genes. The third module (**Module-III, Fig. 2a, and Fig. S3**) describes the molecular regulation of the  $G_2$  and M phases in a nutshell. It considers that the Cdk1-CycB complex in the  $G_2$ -phase overcomes the inhibition by Wee1, and gets activated by Cdc25 due to positive-feedback regulation. It further activates Cdc20 in M-phase which allows the cells to exit from the M-phase by activating Cdh1. Additionally, we have introduced the Cdt1 and Geminin proteins in our model to measure the  $T_{CC}$ ,  $T_{G1}$ , and  $T_{S-G2-M}$  precisely from our model.

A detailed description of different modules and corresponding molecular events are provided in the **supplementary material**. We developed an ordinary differential equation (ODE) based mathematical model (**Table S3**) for the detailed cell cycle network (**Fig. 2A** and **Fig. S3**) and the kinetic parameters for the model are depicted in **Table S4**. The model reproduced the experimentally observed mean  $T_{CC}$ ,  $T_{G1}$ , and  $T_{S-G2-M}$  (**Fig. 2b** for 2% and **Fig. 2c** for 10% serum) under specific serum doses for FUCCI-HeLa cells. Here, we made sure that the number of molecules of mRNAs and proteins is reasonably higher, as in mammalian cells (55–58) (**Fig. 2b-c**), these numbers are considerably higher than budding (59–61) or fission yeast cells (62). Such a deterministic model sets the stage for the stochastic model, where both intrinsic and extrinsic fluctuations can be introduced systematically.

We developed the stochastic simulation protocol (**Fig. 2d**) to simulate cell cycle lineages by picking up random mother cells at  $t=0$ . For each mother cell, at time  $t=0$ , we have chosen transcription rates for each cell cycle gene from log-normal distributions, where the mean of the distributions are the mean deterministic transcription rates of the corresponding genes with a specific CV (28) (**Fig. 2d(i)**). The idea behind transcription rate variability of cell cycle genes stems from the recent observations, where it was suggested that cell-to-cell variability in the propensity to transcribe mRNAs plays a dominant role in gene expression fluctuations (28–30). It was observed that in each cell, the transcriptional activity for a gene fluctuates around a gene-specific mean level with a high correlation in mean transcriptional activity between sisters and mother-daughter pairs, suggesting the existence of transcriptional memory across generations (29, 30). These studies claim that the daughter cells inherit certain factors controlling transcription in a correlated manner but at the same time transcribe genes quite differently from the corresponding mother.

Thus, we added transcription rate fluctuations across cell lineages while implementing Gillespie Stochastic Simulation Algorithm (SSA) to quantify the intrinsic fluctuations (**Fig. S4**) in the expression of genes (**Fig. 2d(ii)**) for the overall cell cycle network (**Table S2** and **Table S3**). Additionally, we have incorporated the extrinsic noise sources in the form of random equal or unequal partitioning of proteins and mRNAs among the two daughter cells during cell division (23)(**Fig. 2d(iii)**), and transcription rate variability of the cell cycle regulatory genes in different phases of the cell cycle (**Fig. 2d(iv)**). Here, we assumed that transcription rates get modified due to epigenetic modifications in S-phase (during DNA-synthesis) (63–65) and M-phase (while sister



chromatids get segregated among the two daughter cells) (31–36). We followed many generations (for 72 h) in the form of lineage trees (**Fig. 2d**) implementing the above-mentioned simulation protocol (**Fig. 2d** and **Fig. S5**) by picking up a random mother cell with transcription rates of all regulatory genes drawn from log-normal distributions (mean deterministic transcription rate with 20% CV). We assumed that during certain stages of the S-phase and M-Phase, these transcription rates either increase or decrease up to 6-30% (details in **Method** section and **Fig. S5**).

### **Model simulations reconciled the experimentally observed cell cycle period and phase duration heterogeneities**

The above-mentioned stochastic simulation protocol (**Table S5**) qualitatively reproduced the mean and variances of the  $T_{CC}$ ,  $T_{G1}$ , and  $T_{S-G2-M}$  distributions for similar numbers of numerically simulated single cells by following several cell lineages under both 2% (**Fig. 3a** and **Fig. S6a-b**) and 10% (**Fig. 3b** and **Fig. S6a-b**) serum conditions. The numerical simulation displayed that under both the serum conditions, the CV of the  $T_{CC}$  slightly decreases at 10% serum, however,  $T_{G1}$  distribution CV decreases, and  $T_{S-G2-M}$  distribution CV either increases or stays the same as the serum dose increases from 2% to 10% (**Fig. 3c**). Intriguingly, even in our numerical simulations, we observe that at 2% serum condition,  $T_{CC}$  correlates to a higher extent with  $T_{G1}$  in comparison to  $T_{S-G2-M}$  (**Fig. 3d** and **Fig. S6c-d**), whereas  $T_{CC}$  correlates more with the  $T_{S-G2-M}$  at 10% serum (**Fig. 3e** and **Fig. S6c-d**). Moreover, the model predicts that the ratio (R) of the CV's of the  $T_{G1}$  and  $T_{S-G2-M}$  distributions (over three simulation replicates, **Table S5**) relatively increases by ~21% as the serum level changes from 2% ( $R_{2\%} = 0.76$ ) to 10% ( $R_{10\%} = 0.92$ ). Interestingly, we have observed similar features in the experimental data (over four experimental replicates, **Table S1**, and **Fig. 1f**) as well, where the relative increase in R is ~21.3% as the serum level goes from 2% ( $R_{2\%} = 0.61$ ) to 10% ( $R_{2\%} = 0.74$ ). Thus, our model qualitatively captures the relationship between the changes in the correlation and fluctuation pattern of the cell cycle phase duration distributions as the serum level varies from 2% to 10%. This analysis suggests that by altering the fluctuation pattern of these phase duration distributions, one can shift the correlation pattern between  $T_{CC}$  Vs  $T_{G1}$  and  $T_{CC}$  Vs  $T_{S-G2-M}$  and vice-versa. How to achieve such kind of alteration and what will be its implications, remained an open question.

A subpopulation level analysis (**Fig. S2A**) using the model demonstrates that for 2% serum, both slow and fast cycling cells have a high  $T_{CC}$  vs  $T_{G1}$  correlation (**Fig. 3f**). However, for 10%

serum,  $T_{CC}$  vs  $T_{S-G2-M}$  correlation increases in slow-cycling cells (**Fig. 3g**). Our simulation further exhibits that the cycling time of mothers is comparably faster than the daughters under both 2% and 10% serum conditions (**Fig. 3h-i** and **Fig. S7a-b**). Our model simulation predicts that the difference in cycling time between mothers and daughters is observed due to an increase in cell density and cell-cell contact in the microenvironment under culture conditions (67, 68).

Fascinatingly, our model simulations reproduced that in cell lineages, the  $T_{CC}$ ,  $T_{G1}$ , and  $T_{S-G2-M}$  are highly correlated in sister pairs under both serum conditions, which is substantially higher than the cousin-cousin and mother-daughter pairs (**Fig. 3j-k**) as observed in our experiments. Our model analysis under 2% and 10% serum conditions suggests that the correlations of  $T_{CC}$ ,  $T_{G1}$ , and  $T_{S-G2-M}$  among sisters, mother-daughter, and cousin-cousin pairs are kind of independent of serum conditions. This is in line with our experimental observations (**Fig. 1m-n**) and is in contrast with the previous studies (17, 20, 22) where only a single serum condition was employed to report such correlations. We will elucidate how these correlations remain independent of the serum doses in the coming sections. However, our study, for the first time revealed that such correlations in cell lineage pairs for cell cycle period and phase durations can be explained from a generic stochastic cell cycle network-based model. Our stochastic model performed quite efficiently to reconcile such complex experimental observations and could potentially unravel the crucial factors governing the  $T_{CC}$ ,  $T_{G1}$ , and  $T_{S-G2-M}$  heterogeneities.

### **Transcriptional fluctuation governs the cell cycle period and phase duration heterogeneities**

The proposed model (**Fig. 2**) includes all the essential deterministic regulations, intrinsic noise, and different extrinsic noise sources, which eventually drive the heterogeneous cell cycle progression in mammalian cells. Thus, it provides the opportunity to decipher the effect of these regulatory processes on  $T_{CC}$ ,  $T_{G1}$ , and  $T_{S-G2-M}$  heterogeneities by considering different reduced versions (**Table-1**) of our initially proposed full network-based stochastic model (**M-1, Fig. 4a** and **Table-1**). First, we performed simulation by considering only intrinsic fluctuations, where each starting mother cell for different cell lineages has the deterministic mean transcription rates for all the genes, and during division is partitioning the molecular regulators unequally among the two daughters (**M-2, Table-1**). Under this scenario, the mean  $T_{CC}$  and  $T_{G1}$  decrease with the increased serum level without much variation in the  $T_{S-G2-M}$ . However, this version of the model substantially underestimates (**M-2, Fig. 4b**, and **Table-S6**) the  $T_{CC}$ ,  $T_{G1}$ , and  $T_{S-G2-M}$  variabilities

in comparison to the experimental observation (**Fig. 4a**). We observed a bit of sister-sister correlation of  $T_{CC}$  at 2% serum, which was absent at 10% serum level. However, no perceptible cousin-cousin or mother-daughter correlations were found at 2% or 10% serum levels (**M-2, Fig. 4b, and Table-S6**). This suggests that extrinsic fluctuations in the form of transcription rate variation may significantly affect such a correlation pattern found in cell lineage analysis.

To verify this idea, using a deterministic model (**M-3, Table-1**), we simulated the cell lineages by including the transcription rate variabilities for each starting mother cell for a specific lineage, which during division is partitioning the molecular regulators unequally among the two daughters. Thus, the intrinsic variabilities due to inherent molecular fluctuations are absent in the **M-3** model. **M-3** model shows higher fluctuations in  $T_{CC}$ ,  $T_{G1}$ , and  $T_{S-G2-M}$  (more than **M-2** Model)) with growing transcription rate fluctuations (CV=0% to 40%, for the respective log-normal distributions **Table-S7**) and produces a high correlation in  $T_{CC}$  of sister pairs for both 2% and 10% serum conditions (**M-3, Fig. 4c, and Table-S6**). Intriguingly, it reveals that if all the cells in different lineages have identical transcription rates, then a highly correlated  $T_{CC}$ ,  $T_{G1}$ , and  $T_{S-G2-M}$  can be observed for sisters, cousins, and even for mother-daughter pairs (**M-3, Fig. 4c, and Table-S6**). This displays that transcriptional variability across cell populations considerably contributes to the fluctuation pattern of  $T_{CC}$ ,  $T_{G1}$ , and  $T_{S-G2-M}$  and causes the high  $T_{CC}$  correlations among sister pairs. This demonstrates that transcriptional rates can indeed get inherited (30, 35) by both the daughters from their mother to cause such high correlations.

However, experimentally we do not observe such a high correlation in cousins and mother-daughter pairs, which was confirmed by our full stochastic model (**Fig. 4a and Table-S6**). Here comes the importance of the transcription rate variations introduced by us during the S-phase and M-phase, respectively, which take into account the epigenetic modifications (31–36, 63–66) due to genome reorganization during DNA synthesis and separating the sister-chromatids to the respective daughter cells. We numerically included the effect of these events in the model by altering the extent of transcription rate variability for each transcript by using a uniformly distributed random number and adjusted the transcription rates accordingly during S and M-phases, respectively (**Table-S8, See Method** for details). Including this feature of transcription rate variation in the **M-4** model (**M-4, Table-1**) leads to a lower correlation of  $T_{CC}$ ,  $T_{G1}$ , and  $T_{S-G2-M}$  among cousins and mother-daughter pairs, without affecting the sister-sister correlations (**M-4, Fig. 4d, Table-S6 and Table S8**).

This gets further confirmed when we ignored transcription rate variation (**M-5, Table-1**) during the cell cycle in our full model. We observe an increasing level of cousin-cousin and mother-daughter correlation in the **M-5** model simulation (**M-5, Fig. 4e, and Table-S6**), which is absent in the experimental findings. This implies that there should be sufficient variation of transcription rates in S and M phases during each cell cycle of every individual cell to create reduced  $T_{CC}$ ,  $T_{G1}$ , and  $T_{S-G2-M}$  correlation in mother-daughter and cousin pairs (**Table S8**). Considering equal partitioning of molecular regulators during cell division (**Table S9 and Fig. S8**) instead of unequal partitioning only increases the  $T_{G1}$  correlation in sisters, cousins, and mother-daughter pairs a bit with a greater increase in  $T_{G1}$  correlation at 10% serum (**Table-S9**).

It is clear from the above analysis that the serum availability has less influence in controlling the correlation of  $T_{CC}$ ,  $T_{G1}$ , and  $T_{S-G2-M}$  of sisters, cousins, and mother-daughters. However, our full model (**M-1, Table-1**) analysis reconciled the fact that serum affects the variability of the individual phase duration distributions considerably (**Fig. 3a-c and Fig. 4a**) at the population level, as an increase in serum from 2% to 10%, reduces mean duration and CV of  $T_{G1}$  and increases the mean  $T_{S-G2-M}$ . This consequently reverses the nature of the correlation pattern of  $T_{CC}$  with  $T_{G1}$  and  $T_{S-G2-M}$  (at 2%  $T_{CC}$  correlates more with  $T_{G1}$ , but at 10%  $T_{CC}$  correlates more with  $T_{S-G2-M}$ ) (**Fig. 3d-e and Fig. 4a**). How change in serum level induces such kind of correlation reversal? To answer this intriguing question, we look back into our proposed cell cycle network (**Fig. 2a**) and find that serum not only activates the initiators (CycD and Myc (69–71)) of the cell cycle in the  $G_1$ -phase, it further activates the Wee1 expression (72, 73) in  $G_2$  phase. Activation of Wee1 by serum essentially prolongs the  $T_{S-G2-M}$ , as the serum dose is increased from 2% to 10%. Our reduced model (**M-6, Table-1**) simulation (assuming no serum mediated activation of Wee1) revealed that both the mean  $T_{G1}$  and  $T_{S-G2-M}$  and related fluctuation decreases, as we increase the serum level from 2% to 10% (**M-6, Fig. 4f, and Table-S6**). Consequently, in both 2% and 10% serum conditions, the CV of  $T_{G1}$  remains considerably higher than the CV of  $T_{S-G2-M}$ . This indicates that the serum-dependent cell cycle network functions in a highly coordinated manner to control the overall heterogeneities of the  $T_{CC}$ ,  $T_{G1}$ , and  $T_{S-G2-M}$ . At this end, we perform a detailed sensitivity analysis of the model parameters (**Fig. S9**), which demonstrates that the model generated  $T_{CC}$ ,  $T_{G1}$ , and  $T_{S-G2-M}$  change either marginally or moderately, even if we modify any related kinetic parameters of the model. This shows that our model predictions are quite robust.

### **Inhibiting p38-signaling alters the cell cycle duration heterogeneities at low serum condition**

The observations made from the **M-6** model (**Table 1**) simulations indicate that it may be possible to perturb the serum-dependent cell cycle regulatory network in a specific manner to control the related heterogeneities. Since cells commit to active cell cycle progression during the  $G_1$ -phase of the cell cycle (7), reducing the CV of the  $T_{G_1}$  distribution for an actively proliferating population of cells under low serum conditions may lead to novel therapeutic insights to get rid of the cancerous cells within a malignant tumor, where cells can proliferate even under serum depleted conditions (7). Literature studies suggest that p38, a stress-signaling protein kinase, retards  $G_1$  progression by inhibiting the transcription of Myc and CycD and promotes S- $G_2$ -M progression by activating Plk1 kinase under normal growth conditions in mammalian cells (74–77). Hence, we hypothesize (**Fig. S10a**) that inhibiting p38 protein-mediated signaling at a 2% serum condition may modulate the mean and variance of  $T_{G_1}$ , which will lead to an increase in the correlation of  $T_{CC}$  and  $T_{S-G_2-M}$ , as observed under 10% serum condition (**Fig. 3e**).

We incorporated the concept of inhibiting p38 signaling by introducing the effect of the p38-inhibitor in a phenomenological manner (**Table S10**) in our deterministic model (See **Supplementary text** for details) and the model simulation at 2% serum condition shows a decrease and an increase in  $T_{G_1}$  and  $T_{S-G_2-M}$ , respectively (**Fig. S10b**). The stochastic simulation at 2% serum condition in presence of p38-inhibitor demonstrates reduced mean and variability of  $T_{G_1}$  (**Table S11**). The model simulation further predicts that the CV of  $T_{CC}$ ,  $T_{G_1}$ , and  $T_{S-G_2-M}$  at 2% serum condition in presence of p38-inhibition (**Fig. 5a** and **Table S11**) will show a trend as observed for 10% serum condition without any inhibition (**Fig. 1f**). This effect produced in the CV of  $T_{CC}$ ,  $T_{G_1}$ , and  $T_{S-G_2-M}$  will accompany with a higher correlation between  $T_{CC}$  and  $T_{S-G_2-M}$  (**Fig. 5b**), which is in stark contrast with the control simulation performed at 2% serum condition (**Fig. 5b** and **Table S11**) without p38-inhibitor. At the lineage level, model simulation exhibited a slight drop in the sister-sister  $T_{CC}$  correlation due to a drop in the  $T_{S-G_2-M}$  correlation (**Fig. 5c**) under the p38 inhibition condition, while for the mother-daughter pair, these correlations remain unaffected (**Fig. 5c**). However, the cousin-cousin  $T_{CC}$  correlation increases slightly under the p38-inhibition (**Fig. 5c** and **Table S11**) condition due to an increase in the  $T_{S-G_2-M}$  correlation.

To verify our model predictions, we cultured FUCCI-HeLa cells at 2% serum along with a p38 inhibitor and performed live-cell imaging. The analysis of live-cell imaging revealed a decrease in mean  $T_{G_1}$  with an increased mean  $T_{S-G_2-M}$  (**Table S12**) under the p38 inhibitor

condition compared to the control cell population, where the  $T_{G1}$  variability decreases (**Table S12**). Moreover, experimentally quantified CV of  $T_{G1}$  at 2% serum condition in presence of p38-inhibition is considerably lower than the control situation as predicted by our model simulation (**Fig. 5d** and **Table S12**). Intriguingly, under 2% serum condition,  $T_{CC}$  vs  $T_{G1}$  correlation is found to be lower than the  $T_{CC}$  vs  $T_{S-G2-M}$  in the presence of p38 inhibitor (**Fig. 5e** and **Table S12**), which is in agreement with the model prediction. Interestingly, under 2% serum along with p38-inhibitor, the  $T_{CC}$ ,  $T_{G1}$  and  $T_{S-G2-M}$  correlations among the sisters and mother-daughter pairs remain similar to that observed under the control situation (**Fig. 5f** and **Table S12**). However, the cousin-cousin pair shows a lower correlation under the p38-inhibitor condition (**Fig. 5f** and **Table S12**). Thus, the p38-inhibition study under 2% serum displays that  $T_{CC}$ ,  $T_{G1}$ , and  $T_{S-G2-M}$  heterogeneities at the overall cell population level can be fine-tuned to create lower variability in  $T_{G1}$ , which may have therapeutic relevance to get rid of the unwanted carcinogenic cells within a tumor.

## Discussion:

Identifying the governing factors that organize the cell duration heterogeneities is a challenging task (8, 9, 12, 17, 19–22). In this article, we combined live-cell imaging studies of FUCCI-HeLa cells (**Fig. 1**) with an appropriate cell cycle network-based stochastic mathematical model (**Fig. 2**) and unraveled the major factors that control the heterogeneities associated with the  $T_{CC}$ ,  $T_{G1}$ , and  $T_{S-G2-M}$  in a serum-dependent manner (**Fig. 6**). First, we demonstrated that the transcription rate variability in different cell lineages present within the cellular population is responsible for the high correlations in  $T_{CC}$  among sister pairs across cell lineages (**Fig. 6a**, and **Fig. 3-4**). By employing a specific model variant (**M-4 Model, Table-1**), we revealed that the transcription rates alteration due to epigenetic modifications during S-phase and M-phases lead to a moderate to low correlation in cousins and mother-daughter pairs without affecting the high sister-sister correlation (**Fig. 6a**, and **Fig. 4d**). These findings substantiate the idea that cell-to-cell variability in the transcription of mRNA for different regulatory genes is the major source of variability in mammalian cells (28–30).

Further, these studies suggested that daughter pairs inherit the transcription rates from the respective mother in a correlated manner (28–30), and it causes the correlated transcription pattern of various genes during the  $G_1$ -phase among the daughter pairs. Our analysis with Cdt1 and Geminin time courses for two representative experimental (**Fig. 6b(i)**) and theoretical (**Fig. 6b(ii)**)

cell lineages revealed that the high sister-sister correlation is indeed emanated from the highly correlated transcriptional activity of the cell cycle genes (we showed Cdt1 and Geminin) during G<sub>1</sub>-phase, due to inheritance of same transcriptional rates for all genes by both the sisters from their mother. However, mothers T<sub>CC</sub> remain less correlated with the daughters T<sub>CC</sub> as mothers only spent a few hours with the transcription rate after the epigenetic modification in M-phase, which are inherited by the respective daughters during cell division. Any loss in the correlation between sisters arises from intrinsic molecular fluctuations and unequal molecular partitioning during cell division (**Fig. 4**). Due to epigenetic modifications, the transcriptional rates get altered during the S and M phases, and the respective daughters come up with different transcription rates for all the genes before the next cell division. However, this effect leads to a significant drop in the cousin-cousin correlation (**Fig. 1m-n, Fig. 3j-k, and Fig. 6a-b**) as the extent of epigenetic modifications is different in respective sisters (**Fig. 6b**). It also caused the desynchrony in T<sub>S-G<sub>2</sub>-M</sub> (**Fig. 6b**) and little loss of T<sub>CC</sub> correlation among sister pairs. This observation is in contrast with that made by Dowling et al. (17) where they concluded that cells spend a near equal proportion of T<sub>CC</sub> as T<sub>S-G<sub>2</sub>-M</sub> and that creates the correlation among sibling pairs. These are important model predictions that can be experimentally probed in the future by performing in-situ epigenetic modifications in the cycling population of cells. Interestingly, the model simulation and experiments showed that the change in serum level did not modify the above-mentioned correlations appreciably (**Fig. 1m-n, and Fig. 3j-k**) among sisters, cousins, and mother-daughter pairs, demonstrating the robust nature of these correlations. Thus, our model provides a highly plausible and realistic explanation of the cell lineage pair correlations from a cell cycle network-based dynamical model.

Second, we captured the subtle effect of serum modulation on the overall cellular population of FUCCI-HeLa cells. We observed that shifting the serum level from 2% to 10% caused a decrease and an increase in mean, variance, and CV of T<sub>G<sub>1</sub></sub> and T<sub>S-G<sub>2</sub>-M</sub>, respectively (**Fig. 6c and Fig. 1d-f**), which lead to higher T<sub>CC</sub> vs T<sub>S-G<sub>2</sub>-M</sub> correlation at 10% serum in comparison to higher T<sub>CC</sub> vs T<sub>G<sub>1</sub></sub> correlation at 2% serum (**Fig. 6c and Fig. 1g-h**). These observations are quite counterintuitive and in contrast with what had been reported for budding yeast cell cycle (78, 79), where an increase in glucose dosage in media increases the number of proteins and mRNAs within the cells, which leads to a decrease in the mean as well as variances of T<sub>CC</sub>, T<sub>G<sub>1</sub></sub>, and T<sub>S-G<sub>2</sub>-M</sub>. Our model predicted that for mammalian cells, a coordinated effect of serum mediated activation of CycD and Myc in the G<sub>1</sub>-phase and Wee1 in the S-G<sub>2</sub>-M phase, and the extrinsic noise due to

transcription rate fluctuation across cell lineages and during the S and M-phases during cell cycle progression produced such kind of unique fluctuation and correlation pattern (**Fig. 3a-e**). The slowly growing cells mostly dictated the overall variability pattern of  $T_{G1}$  and  $T_{S-G2-M}$  for the overall cellular population under different serum levels (**Fig. 1i-j** and **Fig. 3f-g**), however, the mother's  $T_{CC}$  was always faster than the daughter's  $T_{CC}$  (**Fig. 1k-l** and **Fig. 3h-i**) as observed in case of budding yeast cells (78).

Third, we showed that it is possible to perturb the cell cycle regulatory network to achieve a lower mean and variance of  $T_{G1}$  for a proliferating population of the cell under lower (2%) serum conditions by employing a p38-signaling inhibitor (**Fig. 6d** and **Fig. 5**). This may lead to effective therapeutic strategies to get rid of the slowly proliferating cells within the tumor population, as cells in tumors do survive and some of them evade chemotherapies due to higher  $T_{G1}$  variability under minimal growth conditions (**Fig. 1d** and **Fig. 5d**). Cells in presence of p38-inhibitor (with 2% serum) behaved as if they were under 10% serum condition, and demonstrated a signature high  $T_{CC}$  vs  $T_{S-G2-M}$  correlation (**Fig. 5e**). However, the correlation of  $T_{CC}$ ,  $T_{G1}$ , and  $T_{S-G2-M}$  for cell lineage pairs remained grossly unaltered even under inhibitory conditions (**Fig. 5f**). Importantly, our stochastic model simulation adequately captured these features of  $T_{CC}$ ,  $T_{G1}$ , and  $T_{S-G2-M}$  heterogeneities (**Fig. 5a-c**). This demonstrates that the  $T_{CC}$ ,  $T_{G1}$ , and  $T_{S-G2-M}$ -related heterogeneities can be influenced by just intervening at the cellular network level. Finally, by employing different model variants (**Table-1**), we showed that intrinsic fluctuations hardly affected the variances of  $T_{CC}$ ,  $T_{G1}$ , and  $T_{S-G2-M}$  due to high copy numbers of mRNAs and proteins in mammalian cells (55–58), but modified the extent of variabilities originated due to transcription rate modifications (**Fig. 4** and **Table-S6**).

In conclusion, our modeling study systematically establishes that transcription rate variation across cell lineages and during cell cycle progression majorly governs the cell cycle period and phase duration heterogeneities both at the cell lineage and overall population level. This contrasts the ideas of previous studies, where either it was suggested that circadian clock mediated cell cycle modulation (12, 20), or hidden long-range memories of growth and cell cycle period (22) caused the cell cycle duration heterogeneities across cell lineages. In our study, we considered a realistic cell cycle network model and addressed various facets of cell duration heterogeneities both at the cell lineage and at the overall population level under different serum conditions to elucidate the contribution of both stochastic and deterministic effects that organized the cell cycle



duration heterogeneities. We demonstrated that the  $T_{CC}$ ,  $T_{G1}$  and  $T_{S-G2-M}$  related correlation in the cell lineage pairs remained almost unaltered under external perturbations suggesting that these features of cell cycle duration heterogeneities were extremely robust. However, for the overall cellular population, the mean and variances of  $T_{CC}$ ,  $T_{G1}$ , and  $T_{S-G2-M}$  can be systematically altered by perturbing the cell cycle regulatory network. We believe that these insights will invoke new ideas to alter the mammalian cell cycle period and phase durations advantageously to produce novel therapeutic strategies.

## **Materials and Methods:**

### **Cell culture:**

HeLa cells and FUCCI -HeLa cells were cultured in DMEM medium (Hi Media, AT007) supplemented with 10% FBS (Gibco) and 1% Penicillin-Streptomycin (Hi Media,) at 37°C and 5% CO<sub>2</sub>.

### **Generation of a stable cell line expressing FUCCI:**

Lentiviral plasmids containing the FUCCI genes -mKO2-hCdt1 (30/120) and mAG-hGeminin (1/110) were kindly gifted by Prof Atsushi Miyawaki, Lab for Cell Cycle Dynamics, RIKEN Brain Science Institute, Japan. The packaging and envelope plasmids (pCAG-HIVgp and pCMV-VSV-G-RSV-REV) were purchased from RIKEN BRC DNA BANK, Japan, and were used for lentivirus production. Plasmids containing mKO2-hCdt1 (30-120) and mAG-hGeminin (1-110) were co-transfected with envelope and packaging plasmids into LentiX-293T cells (Takara bio) to generate lentiviral particles. High-titer viral solutions were prepared and used for transduction. HeLa cells were first transduced with the virus-containing mAG-hCdt1 (30-120) gene and those cells which express RFP were sorted using FACS. Next, transduction was done on these sorted RFP positive cells using the virus-containing mKO2-hGem (1-110) gene. FACS sorting was done based on RFP fluorescence to obtain double-positive cells expressing FUCCI.

### **Live cell imaging and data extraction:**

For live-cell imaging, on day 1, ~ 10,000 FUCCI expressing HeLa cells were seeded per well of 6 well plates in opti-MEM media supplemented with FBS (2% or 10%) and 1% penicillin-streptomycin. On day 2, live-cell imaging was done using Zeiss Observer Z1 inverted fluorescence microscope fitted with a high-speed microlens-enhanced Nipkow spinning disc (Yokogawa CSU-X1 automated model) in a temperature (37°C) and CO<sub>2</sub> (5%) controlled incubation stage. A

halogen lamp is used as a light source along with Alexafluor 488 and Rhodamine filters. 10 positions were selected and images were taken every 15 min interval for all the 10 positions selected for 3 days.

Zen software was used to process the .dzi files and create .tiff images for tracking. To obtain FUCCI trajectory in single cells, each cell was tracked by clicking the center of the nucleus using the 'Manual tracking' plugin available in ImageJ software. The positions (x, y) of the tracked cell are stored as a text file. An ImageJ script was written to create ROI using the x, and y coordinates and measure the mean fluorescence intensity at each channel for each cell. The duration between birth and the next division gives the cell cycle duration for a cell. The time corresponding to maximum RFP intensity is considered as the end of  $G_1$ . The S- $G_2$ -M duration is calculated by subtracting  $G_1$  time from total cell cycle time. The distribution graphs were plotted using Origin software.

### **Deterministic simulation:**

The differential equations used for deterministic simulation (**Table S3**) and the parameter values (**Table S4**) are given in the **supplementary material**. Using these, we have simulated the cell cycle model using a CVODE solver in XPPAUT 8.0 software and obtained periodic oscillation of the cell cycle network components for 2% and 10% serum levels (the ODE file will be available upon request). In this regard, we have tried to keep the number of proteins and mRNA in accordance with that reported for mammalian cells and performed some preliminary bifurcation analysis to set the deterministic model in the appropriate parametric regime.

### **Simulation in cell lineages:**

To follow cells in lineages in our simulation similar to experiments, we developed an algorithm (**Fig. S5**), where we followed cells from Generation 0 to at most Generation III in each lineage for 'n' lineages during a 72-h simulation period. To perform stochastic simulation of models-M-1, M-2, M-5, and M-6 (**Table-1**), 'Direct method of Gillespie algorithm' (80) was used by incorporating the various sources of extrinsic variabilities (**Fig. 2d**) as described in **Table-1**. The details protocol for the simulation method is provided in **Fig. S5** and the corresponding figure legend. The code for stochastic simulation was written in Fortran language (the code will be available upon request). By adopting a similar lineage simulation algorithm, we investigated the role of various extrinsic noise sources (**Fig. 2d**) in the absence of intrinsic fluctuations, by developing a Matlab code (the code will be available upon request) for the models-M-3 and M-4 (**Table-1**). For these models, the

differential equations (**Table S3**) were solved using Matlab ODE solver (ODE15s) with the parameters mentioned in **Table S4**.

To obtain cell cycle period,  $G_1$ , and S- $G_2$ -M duration distributions, we collect the cell cycle and phase timings from all the cells that had a complete cycle during the simulation period of 72 hrs. The cell cycle time is calculated using the birth and division time for each cell. Our simulation also keeps track of Cdt1 and Geminin dynamics during the simulation for each cell. The time difference between birth and the Cdt1 peak is considered as the end of  $G_1$ . The S- $G_2$ -M time is calculated from the total cell cycle period and  $G_1$  time. For distribution graphs and variability calculation under different serum conditions, all the cells with a complete cycle from all the lineages were considered. All possible mother-daughter, sister, and cousin pairs with complete cell cycle duration irrespective of the generation was used to determine correlations in the cell cycle period and phase durations.

## **Acknowledgments**

We thank Prof Atsushi Miyawaki, Lab for Cell Cycle Dynamics, RIKEN Brain Science Institute, Japan for generously providing FUCCI plasmids. We thank Cell Culture Facility at the Department of Chemistry, IIT Bombay, the Spinning Disc Confocal Microscope facility at BSBE, IIT Bombay, and FACS facilities at BSBE and CRNTS, IIT Bombay for allowing us to use them for this work. We thank IIT Bombay for providing the TA fellowship to VG. This work is supported by the funding agencies **DBT, India** (Grant no. **BT/PR11932/BRB/10/1315/2014**) and **SERB, India** (Grant no. **CRG/2019/002640**, Grant no. **MTR/2020/000261** and Grant no. **EMR/2014/000500**).

## **Conflict of Interest**

The authors declare that they have no conflict of interest.

## References:

1. G. Froese, The distribution and interdependence of generation times of HeLa cells. *Exp. Cell Res.* **35**, 415–419 (1964).
2. K. B. Dawson, H. Madoc-Jones, E. O. Field, Variations in the generation times of a strain of rat sarcoma cells in culture. *Exp. Cell Res.* **38**, 75–84 (1965).
3. H. Miyamoto, E. Zeuthen, L. Rasmussen, Clonal growth of mouse cells (strain L). *J. Cell Sci.* **13**, 879–888 (1973).
4. R. Shields, J. A. Smith, Cells regulate their proliferation through alterations in transition probability. *J. Cell. Physiol.* **91**, 345–355 (1977).
5. R. Van Wijk, K. W. Van De Poll, Variability of Cell Generation Times in a Hepatoma Cell Pedigree. *Cell Prolif.* **12**, 659–663 (1979).
6. R. G. Staudte, R. M. Huggins, J. Zhang, D. E. Axelrod, M. Kimmel, Estimating clonal heterogeneity and interexperiment variability with the bifurcating autoregressive model for cell lineage data. *Math. Biosci.* **143**, 103–121 (1997).
7. K. W. Overton, S. L. Spencer, W. L. Noderer, T. Meyer, C. L. Wang, Basal p21 controls population heterogeneity in cycling and quiescent cell cycle states. *Proc. Natl. Acad. Sci.* **111**, E4386–E4393 (2014).
8. K. Pham, *et al.*, Converse Smith-Martin cell cycle kinetics by transformed B lymphocytes. *Cell Cycle* **17**, 2041–2051 (2018).
9. E. S. Knudsen, *et al.*, CDK/cyclin dependencies define extreme cancer cell-cycle heterogeneity and collateral vulnerabilities. *Cell Rep.* **38**, 110448 (2022).
10. C. E. Meacham, S. J. Morrison, Tumour heterogeneity and cancer cell plasticity. *Nature* **501**, 328–337 (2013).
11. M. P. F. Damen, J. van Rheenen, C. L. G. J. Scheele, Targeting dormant tumor cells to prevent cancer recurrence. *FEBS J.* **288**, 6286–6303 (2021).
12. S. Chakrabarti, *et al.*, Hidden heterogeneity and circadian-controlled cell fate inferred from single cell lineages. *Nat. Commun.* **9**, 1–13 (2018).
13. A. Waisman, *et al.*, Cell cycle dynamics of mouse embryonic stem cells in the ground state and during transition to formative pluripotency. *Sci. Rep.* **9**, 1–10 (2019).
14. N. Gruenheit, *et al.*, Cell Cycle Heterogeneity Can Generate Robust Cell Type Proportioning. *Dev. Cell* **47**, 494–508.e4 (2018).

15. L. Otsuki, A. H. Brand, Cell cycle heterogeneity directs the timing of neural stem cell activation from quiescence. *Science (80-. )*. **360**, 99–102 (2018).
16. S. J. A. Buczacki, *et al.*, Itraconazole targets cell cycle heterogeneity in colorectal cancer. *J. Exp. Med.* **215**, 1891–1912 (2018).
17. M. R. Dowling, *et al.*, Stretched cell cycle model for proliferating lymphocytes. *Proc. Natl. Acad. Sci.* **111**, 6377–6382 (2014).
18. A. Sakaue-Sawano, *et al.*, Visualizing Spatiotemporal Dynamics of Multicellular Cell-Cycle Progression. *Cell* **132**, 487–498 (2008).
19. N. Mosheiff, *et al.*, Inheritance of Cell-Cycle Duration in the Presence of Periodic Forcing. *Phys. Rev. X* **8**, 21035 (2018).
20. O. Sandler, *et al.*, Lineage correlations of single cell division time as a probe of cell-cycle dynamics. *Nature* **519**, 468–471 (2015).
21. M. Mura, C. Feillet, R. Bertolusso, F. Delaunay, M. Kimmel, Mathematical modelling reveals unexpected inheritance and variability patterns of cell cycle parameters in mammalian cells. *PLoS Comput. Biol.* **15**, 1–26 (2019).
22. E. E. Kuchen, N. B. Becker, N. Claudino, T. Höfer, Hidden long-range memories of growth and cycle speed correlate cell cycles in lineage trees. *Elife* **9**, 1–25 (2020).
23. U. Berge, *et al.*, Asymmetric division events promote variability in cell cycle duration in animal cells and *Escherichia coli*. *Nat. Commun.* **10** (2019).
24. S. Klumpp, Z. Zhang, T. Hwa, Growth Rate-Dependent Global Effects on Gene Expression in Bacteria. *Cell* **139**, 1366–1375 (2009).
25. M. B. Elowitz, A. J. Levine, E. D. Siggia, P. S. Swain, Stochastic gene expression in a single cell. *Science (80-. )*. **297**, 1183–1186 (2002).
26. P. S. Swain, M. B. Elowitz, E. D. Siggia, Intrinsic and extrinsic contributions to stochasticity in gene expression. *Proc. Natl. Acad. Sci. U. S. A.* **99**, 12795–12800 (2002).
27. A. Baudrimont, V. Jaquet, S. Wallerich, S. Voegeli, A. Becskei, Contribution of RNA Degradation to Intrinsic and Extrinsic Noise in Gene Expression. *Cell Rep.* **26**, 3752–3761.e5 (2019).
28. M. S. Sherman, K. Lorenz, M. H. Lanier, B. A. Cohen, Cell-to-Cell Variability in the Propensity to Transcribe Explains Correlated Fluctuations in Gene Expression. *Cell Syst.* **1**, 315–325 (2015).

29. A. Sigal, *et al.*, Variability and memory of protein levels in human cells. *Nature* **444**, 643–646 (2006).
30. N. E. Phillips, A. Mandic, S. Omidi, F. Naef, D. M. Suter, Memory and relatedness of transcriptional activity in mammalian cell lineages. *Nat. Commun.* **10**, 1–12 (2019).
31. Y. Liu, *et al.*, Transcriptional landscape of the human cell cycle. *Proc. Natl. Acad. Sci. U. S. A.* **114**, 3473–3478 (2017).
32. S. O. Skinner, *et al.*, Single-cell analysis of transcription kinetics across the cell cycle. *Elife* **5**, 1–24 (2016).
33. T. Muramoto, I. Müller, G. Thomas, A. Melvin, J. R. Chubb, Methylation of H3K4 Is Required for Inheritance of Active Transcriptional States. *Curr. Biol.* **20**, 397–406 (2010).
34. T. Ferraro, *et al.*, Transcriptional Memory in the Drosophila Embryo. *Curr. Biol.* **26**, 212–218 (2016).
35. C. L. Peterson, Transcriptional Memory: Mothers SET the Table for Daughters. *Curr. Biol.* **20**, R240–R242 (2010).
36. A. Pastore, *et al.*, Corrupted coordination of epigenetic modifications leads to diverging chromatin states and transcriptional heterogeneity in CLL. *Nat. Commun.* **10**, 1–11 (2019).
37. C. García-Jiménez, C. R. Goding, Starvation and Pseudo-Starvation as Drivers of Cancer Metastasis through Translation Reprogramming. *Cell Metab.* **29**, 254–267 (2019).
38. J. A. Smith, L. Martin, Do cells cycle? *Proc. Natl. Acad. Sci. U. S. A.* **70**, 1263–1267 (1973).
39. Z. Wei, H. T. Liu, MAPK signal pathways in the regulation of cell proliferation in mammalian cells. *Cell Res.* **12**, 9–18 (2002).
40. A. Martínez-Limón, M. Joaquin, M. Caballero, F. Posas, E. de Nadal, The p38 pathway: From biology to cancer therapy. *Int. J. Mol. Sci.* **21**, 1–18 (2020).
41. T. Zarubin, J. Han, Activation and signaling of the p38 MAP kinase pathway. *Cell Res.* **15**, 11–18 (2005).
42. H. X. Chao, *et al.*, Evidence that the human cell cycle is a series of uncoupled, memoryless phases. *Mol. Syst. Biol.* **15**, 1–19 (2019).
43. S. Mitchell, A. Hoffmann, Systems Biology Identifying noise sources governing cell-to-cell variability. *Curr. Opin. Syst. Biol.* **8**, 39–45 (2017).
44. S. Mitchell, K. Roy, T. A. Zangle, A. Hoffmann, Erratum: Nongenetic origins of cell-to-cell variability in B lymphocyte proliferation (Proc Natl Acad Sci USA (2018) 115 (E2888–

- E2897) DOI: 10.1073/pnas.1715639115). *Proc. Natl. Acad. Sci. U. S. A.* **115**, E8578 (2018).
45. J. J. Tyson, B. Novak, Regulation of the eukaryotic cell cycle: Molecular antagonism, hysteresis, and irreversible transitions. *J. Theor. Biol.* **210**, 249–263 (2001).
  46. B. Novák, J. J. Tyson, A model for restriction point control of the mammalian cell cycle. *J. Theor. Biol.* **230**, 563–579 (2004).
  47. A. Csikász-Nagy, D. Battogtokh, K. C. Chen, B. Novák, J. J. Tyson, Analysis of a generic model of eukaryotic cell-cycle regulation. *Biophys. J.* **90**, 4361–4379 (2006).
  48. G. Yao, T. J. Lee, S. Mori, J. R. Nevins, L. You, A bistable Rb–E2F switch underlies the restriction point. *Nat. Cell Biol.* **10**, 476–482 (2008).
  49. C. Gérard, A. Goldbeter, Temporal self-organization of the cyclin/Cdk network driving the mammalian cell cycle. *Proc. Natl. Acad. Sci. U. S. A.* **106**, 21643–21648 (2009).
  50. A. R. Araujo, L. Gelens, R. S. M. Sheriff, S. D. M. Santos, Positive Feedback Keeps Duration of Mitosis Temporally Insulated from Upstream Cell-Cycle Events. *Mol. Cell* **64**, 362–375 (2016).
  51. A. R. Barr, F. S. Heldt, T. Zhang, C. Bakal, B. Novák, A Dynamical Framework for the All-or-None G1/S Transition. *Cell Syst.* **2**, 27–37 (2016).
  52. D. Sengupta, V. P. S. Kompella, S. Kar, Disproportionate feedback interactions govern cell-type specific proliferation in mammalian cells. *FEBS Lett.* **592**, 3248–3263 (2018).
  53. G. Yao, T. J. Lee, S. Mori, J. R. Nevins, L. You, A bistable Rb–E2F switch underlies the restriction point. *Nat. Cell Biol.* **10**, 476–482 (2008).
  54. J. Moser, I. Miller, D. Carter, S. L. Spencer, Control of the restriction point by rb and p21. *Proc. Natl. Acad. Sci. U. S. A.* **115**, E8219–E8227 (2018).
  55. R. Milo, What is the total number of protein molecules per cell volume? A call to rethink some published values. *BioEssays* **35**, 1050–1055 (2013).
  56. A. Finka, P. Goloubinoff, Proteomic data from human cell cultures refine mechanisms of chaperone-mediated protein homeostasis. *Cell Stress Chaperones* **18**, 591–605 (2013).
  57. T. Geiger, A. Wehner, C. Schaab, J. Cox, M. Mann, Comparative proteomic analysis of eleven common cell lines reveals ubiquitous but varying expression of most proteins. *Mol. Cell. Proteomics* **11**, 1–11 (2012).
  58. N. Nagaraj, *et al.*, Deep proteome and transcriptome mapping of a human cancer cell line. *Mol. Syst. Biol.* **7**, 1–8 (2011).

59. S. Ghaemmaghami, *et al.*, Global analysis of protein expression in yeast. *Nature* **425**, 737–741 (2003).
60. S. Di Talia, J. M. Skotheim, J. M. Bean, E. D. Siggia, F. R. Cross, The effects of molecular noise and size control on variability in the budding yeast cell cycle. *Nature* **448**, 947–951 (2007).
61. F. Miura, *et al.*, Absolute quantification of the budding yeast transcriptome by means of competitive PCR between genomic and complementary DNAs. *BMC Genomics* **9**, 1–14 (2008).
62. S. Marguerat, *et al.*, Quantitative analysis of fission yeast transcriptomes and proteomes in proliferating and quiescent cells. *Cell* **151**, 671–683 (2012).
63. J. Wang, *et al.*, Persistence of RNA transcription during DNA replication delays duplication of transcription start sites until G2/M. *Cell Rep.* **34** (2021).
64. R. Bar-Ziv, S. Brodsky, M. Chapal, N. Barkai, Transcription Factor Binding to Replicated DNA. *Cell Rep.* **30**, 3989-3995.e4 (2020).
65. Y. Ma, K. Kanakousaki, L. Buttitta, How the cell cycle impacts chromatin architecture and influences cell fate. *Front. Genet.* **5**, 1–18 (2015).
66. K. C. Palozola, H. Liu, D. Nicetto, K. S. Zaret, Low-Level, Global Transcription during Mitosis and Dynamic Gene Reactivation during Mitotic Exit. *Cold Spring Harb. Symp. Quant. Biol.* **82**, 197–205 (2017).
67. C. Gérard, A. Goldbeter, The balance between cell cycle arrest and cell proliferation: Control by the extracellular matrix and by contact inhibition. *Interface Focus* **4** (2014).
68. A. Puliafito, *et al.*, Collective and single cell behavior in epithelial contact inhibition. *Proc. Natl. Acad. Sci. U. S. A.* **109**, 739–744 (2012).
69. S. M. Jones, A. Kazlauskas, Growth factor-dependent signaling and cell cycle progression. *FEBS Lett.* **490**, 110–116 (2001).
70. P. Dong, *et al.*, Division of labour between Myc and G1 cyclins in cell cycle commitment and pace control. *Nat. Commun.* **5** (2014).
71. M. Dean, *et al.*, Regulation of c-myc transcription and mRNA abundance by serum growth factors and cell contact. *J. Biol. Chem.* **261**, 9161–9166 (1986).
72. E. Shaulian, M. Karin, AP-1 in cell proliferation and survival. *Oncogene* **20**, 2390–2400 (2001).



73. H. Kawasaki, *et al.*, c-Fos/activator protein-1 transactivates wee1 kinase at G1/S to inhibit premature mitosis in antigen-specific Th1 cells. *EMBO J.* **20**, 4618–4627 (2001).
74. L. Gheghiani, D. Loew, B. Lombard, J. Mansfeld, O. Gavet, PLK1 Activation in Late G2 Sets Up Commitment to Mitosis. *Cell Rep.* **19**, 2060–2073 (2017).
75. K. Lee, A. E. Kenny, C. L. Rieder, P38 mitogen-activated protein kinase activity is required during mitosis for timely satisfaction of the mitotic checkpoint but not for the fidelity of chromosome segregation. *Mol. Biol. Cell* **21**, 2150–2160 (2010).
76. B. Lemmens, *et al.*, DNA Replication Determines Timing of Mitosis by Restricting CDK1 and PLK1 Activation. *Mol. Cell* **71**, 117-128.e3 (2018).
77. J. Tang, X. Yang, X. Liu, Phosphorylation of Plk1 at Ser326 regulates its functions during mitotic progression. *Oncogene* **27**, 6635–6645 (2008).
78. D. Barik, W. T. Baumann, M. R. Paul, B. Novak, J. J. Tyson, A model of yeast cell-cycle regulation based on multisite phosphorylation. *Mol. Syst. Biol.* **6**, 1–18 (2010).
79. D. Barik, D. A. Ball, J. Peccoud, J. J. Tyson, A Stochastic Model of the Yeast Cell Cycle Reveals Roles for Feedback Regulation in Limiting Cellular Variability. *PLoS Comput. Biol.* **12** (2016).
80. D. T. Gillespie, A general method for numerically simulating the stochastic time evolution of coupled chemical reactions. *J. Comput. Phys.* **22**, 403–434 (1976).

## Figures and Tables

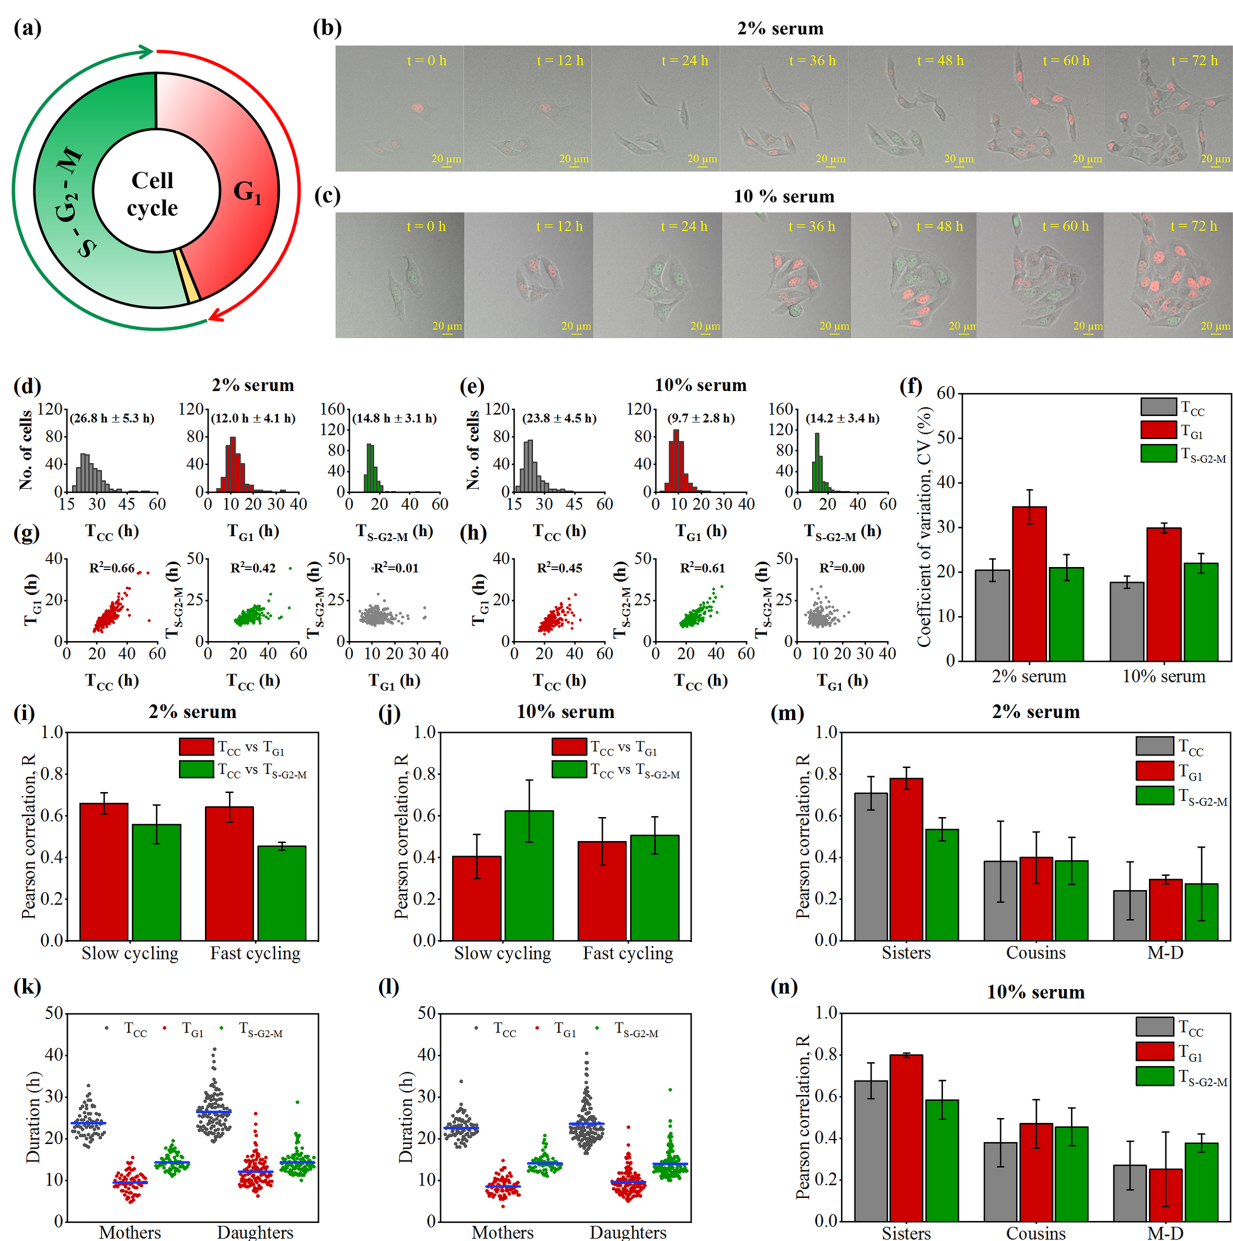

**Fig. 1. Live cell imaging of FUCCI-HeLa cells quantifies the serum-dependent cell cycle period and phase duration heterogeneities.** (a) Schematic depiction of FUCCI-reporter expression dynamics during the cell cycle. Live-cell imaging snapshots (at 12 h intervals) of FUCCI-HeLa cells under (b) 2% serum, and (c) 10% serum conditions.  $T_{CC}$ ,  $T_{G_1}$  and  $T_{S-G_2-M}$  distributions quantified from single-cell imaging data at (d) 2% serum ( $n=300$ , replicate 1) and (e) 10% serum ( $n=300$ , replicate 1) (4 replicates are performed, **Table S1**). (e) CV of  $T_{CC}$ ,  $T_{G_1}$  and  $T_{S-G_2-M}$  distributions were observed across 4 individual replicates (**Table S1**) performed at 2% and 10% serum

conditions. Correlations among  $T_{CC}$ ,  $T_{G1}$  and  $T_{S-G2-M}$  were observed from the single-cell imaging at (g) 2% serum (n=300, replicate 1) and (h) 10% serum (n=300, replicate 1) (4 replicates are performed, **Table S1**). Correlation between  $T_{CC}$ ,  $T_{G1}$  and  $T_{S-G2-M}$  in slow and fast cycling cells at (i) 2% serum and (j) 10% serum for 4 individual replicates (**Table S1**).  $T_{CC}$ ,  $T_{G1}$  and  $T_{S-G2-M}$  distributions for mother and daughter cells (replicate 1) at (k) 2% serum and (l) 10% serum (4 replicates are performed, **Table S1**). Observed correlations (Mean  $\pm$  standard deviation) for  $T_{CC}$ ,  $T_{G1}$  and  $T_{S-G2-M}$  in sisters, cousins and mother-daughter pairs across 4 individual replicates (**Table S1**) at (m) 2% serum and (n) 10% serum conditions.

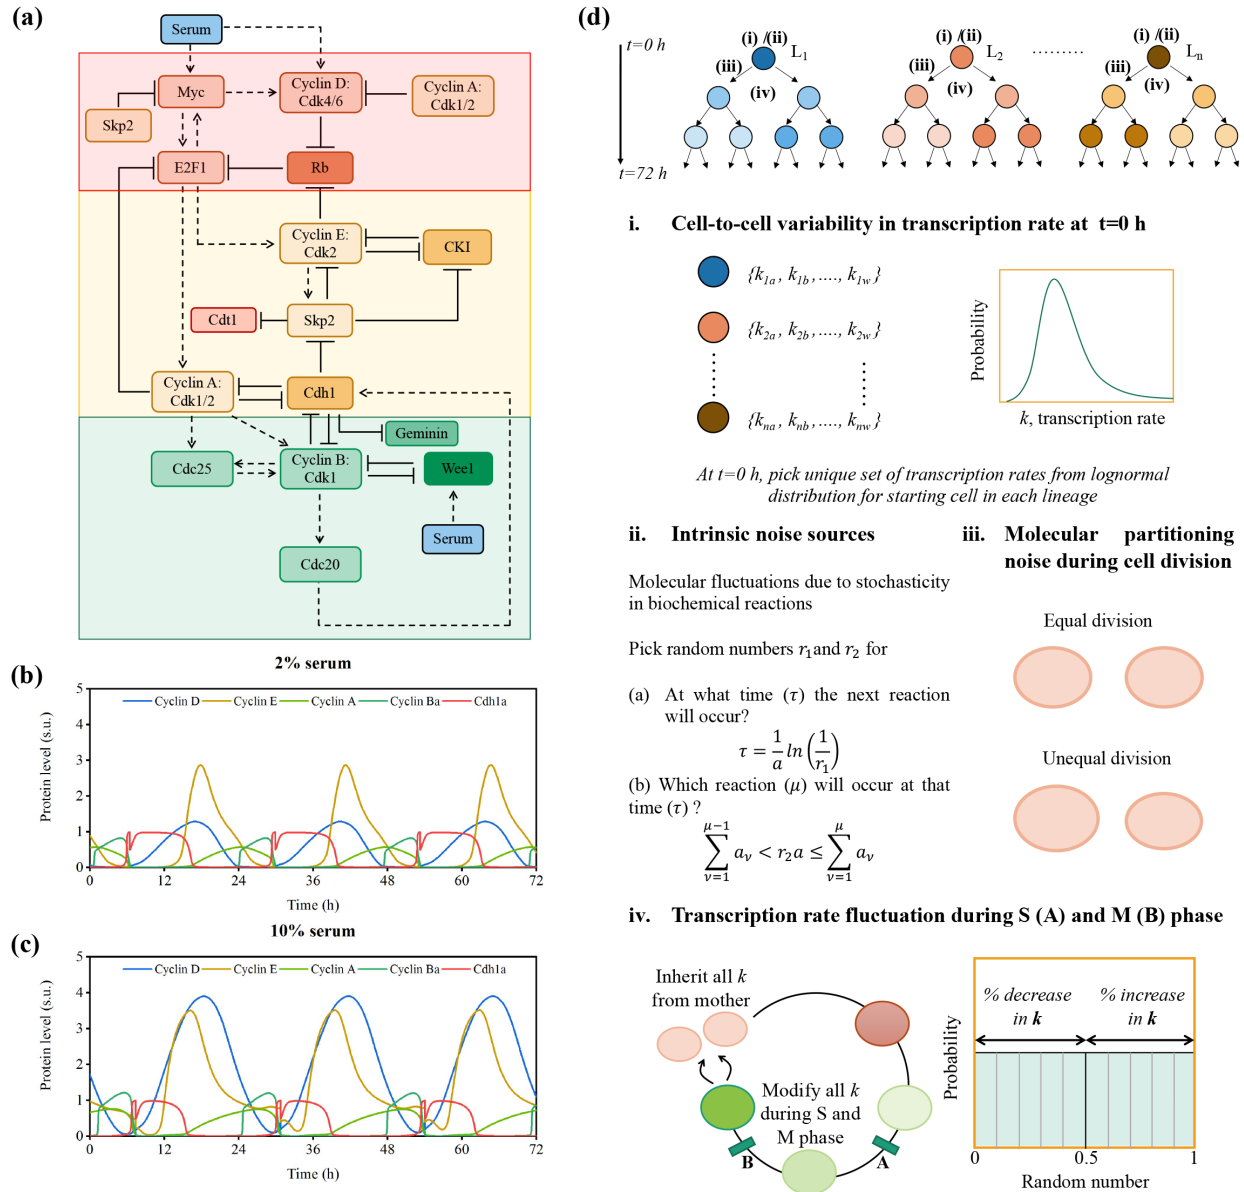

**Fig. 2. Proposed cell cycle network-based stochastic-mathematical model to understand the experimentally observed serum-dependent cell duration heterogeneities.** (a) The minimalistic cell cycle network under the influence of serum. (Solid and dotted arrows indicate the direct and indirect activation processes. Hammerhead arrows indicate inhibition processes.) **Module-I** depicts early  $G_0$  to  $G_1$  regulations. **Module-II** contains the optimal  $G_1$ -S transition and S-phase regulations. **Module-III** represents the  $G_2$ -M phase interactions in a simplified manner (Details in **Supplementary Text-1**). The temporal dynamics for Cyclins and active Cdh1 at (b) 2%, and (c) 10% serum. (d) Numerical simulation strategy to simulate different cell lineages by incorporating extrinsic ((i) cell-to-cell transcription rate variability, (ii) symmetric and asymmetric cell division event, (iii) transcription rate variation during cell cycle process due to epigenetic modifications, etc.) and intrinsic ((ii) due to molecular fluctuations for low copy numbers of proteins and mRNA's) noise sources experienced by the mammalian cells under culture conditions.

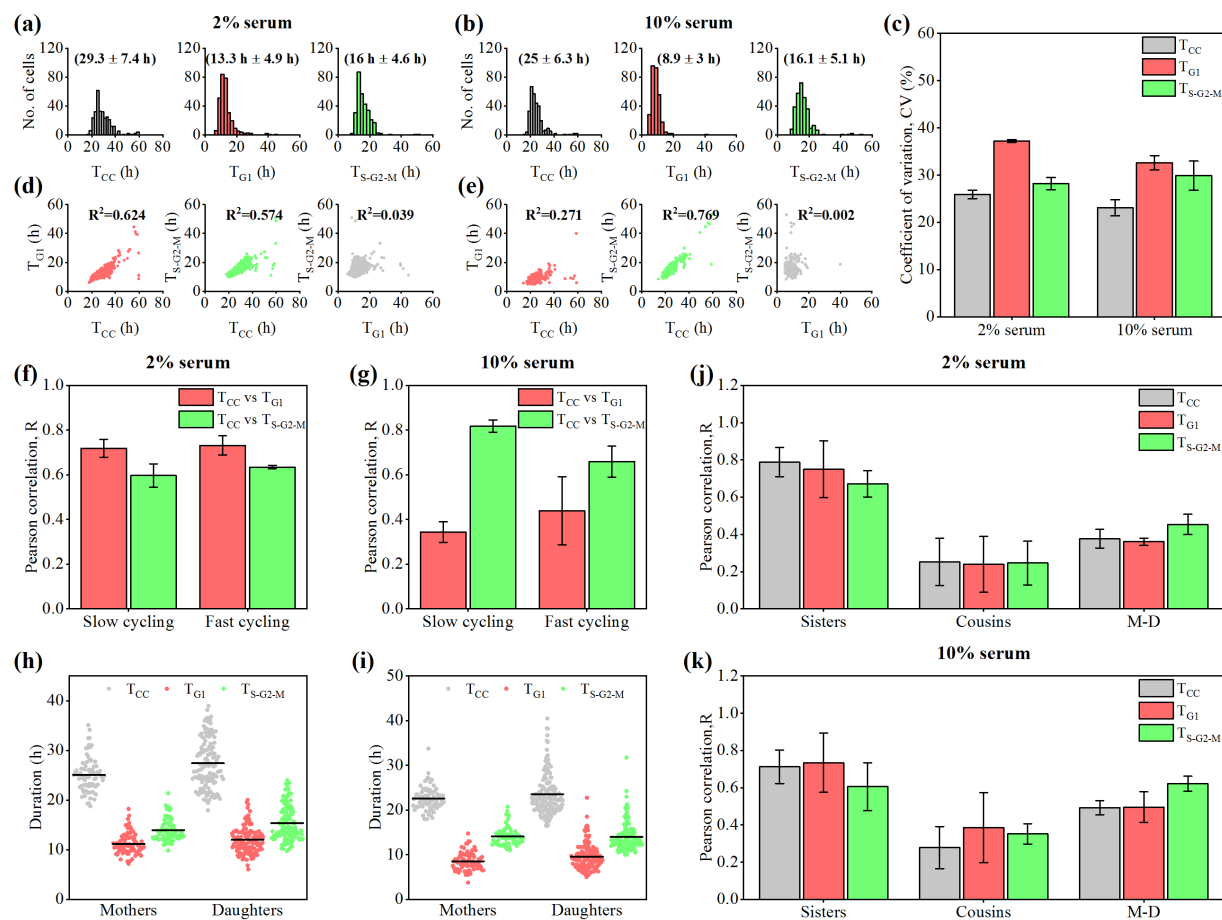

**Fig. 3. Stochastic model simulations corroborate the experimentally observed  $T_{CC}$ ,  $T_{GI}$  and  $T_{S-G2-M}$  heterogeneities.** Distributions of  $T_{CC}$ ,  $T_{GI}$  and  $T_{S-G2-M}$  obtained from stochastic simulation at (a) 2% serum (n=300, replicate 1) and (b) 10% serum (n=300, replicate 1). (c) Average CV in  $T_{CC}$ ,  $T_{GI}$ , and  $T_{S-G2-M}$  was obtained at 2% serum and 10% serum (from 3 replicate simulations, 300 cells each), respectively. Correlation pattern of  $T_{CC}$ ,  $T_{GI}$  and  $T_{S-G2-M}$  at (d) 2% serum (n=300, replicate 1) and (e) 10% serum (n=300, replicate 1). Mean and standard deviation of correlation between  $T_{CC}$ ,  $T_{GI}$  and  $T_{S-G2-M}$  in slow and fast cycling cells at (f) 2% serum and (g) 10% serum. Scatter plot showing the distribution of  $T_{CC}$ ,  $T_{GI}$ , and  $T_{S-G2-M}$  in mothers and daughters (replicate 1) at (h) 2% serum and (i) 10% serum. Mean and standard deviation of  $T_{CC}$ ,  $T_{GI}$ , and  $T_{S-G2-M}$  correlations quantified for sisters, cousins, and mother-daughter pairs performed at (j) 2% serum and (k) 10% serum (3 numerical replicates, Table S6).

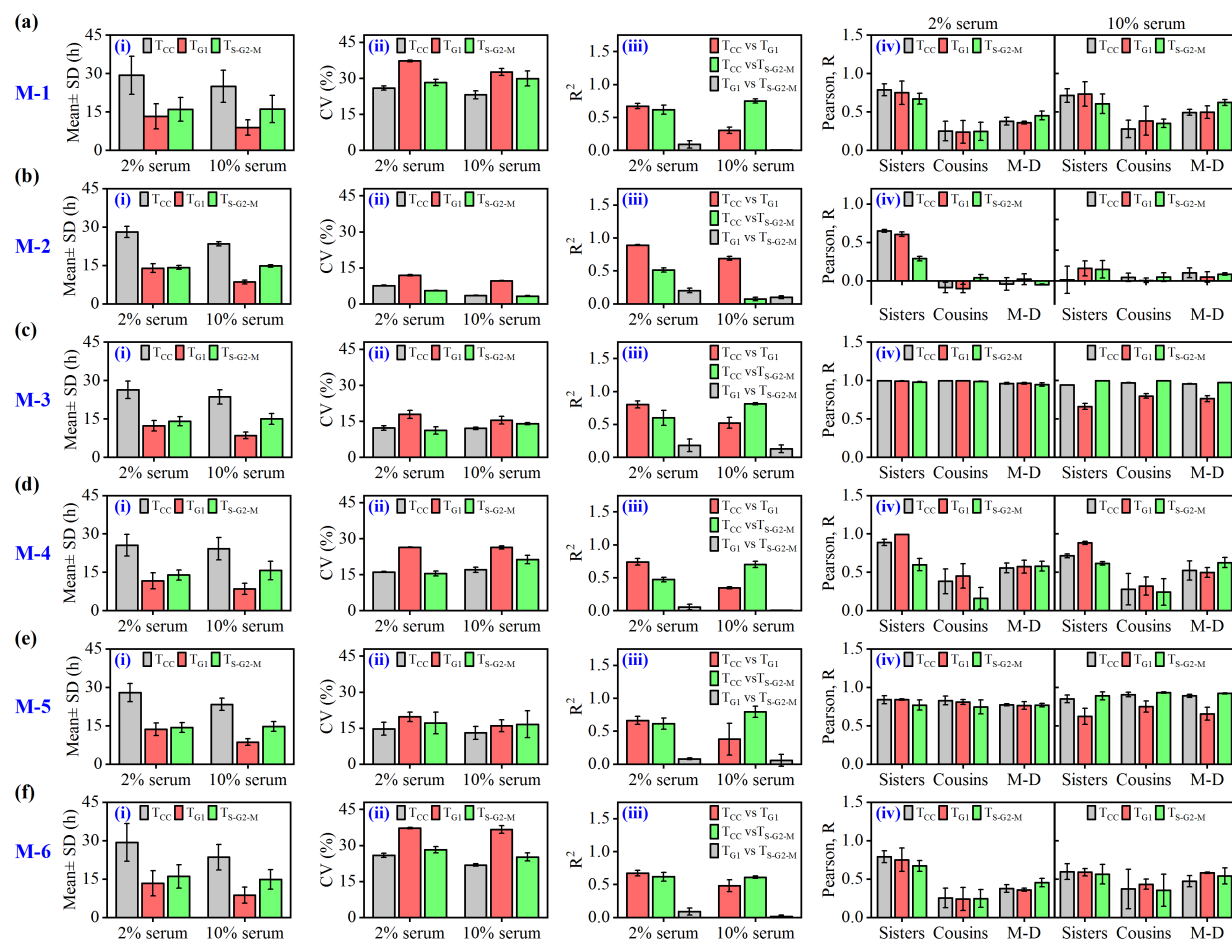

**Fig. 4. Simulation results at 2% and 10% serum conditions for different model variants with unequal division.**

Calculated (i) mean  $T_{CC}$ ,  $T_{G1}$ , and  $T_{S-G2-M}$  ( $\pm$  standard deviation (SD) for Replicate I), (ii) mean CV ( $\pm$  SD), (iii) mean correlation coefficient ( $R^2$ ) ( $\pm$  SD) of  $T_{CC}$ ,  $T_{G1}$  and  $T_{S-G2-M}$ , and (iv) mean Pearson correlation coefficient ( $R$ ) ( $\pm$  SD) obtained for the  $T_{CC}$ ,  $T_{G1}$ , and  $T_{S-G2-M}$  for sisters, cousins and mother-daughter pairs selected from different cell lineages for the model variants (a) M-1, (b) M-2, (c) M-3, (d) M-4, (e) M-5 and (f) M-6 defined in **Table-1**.

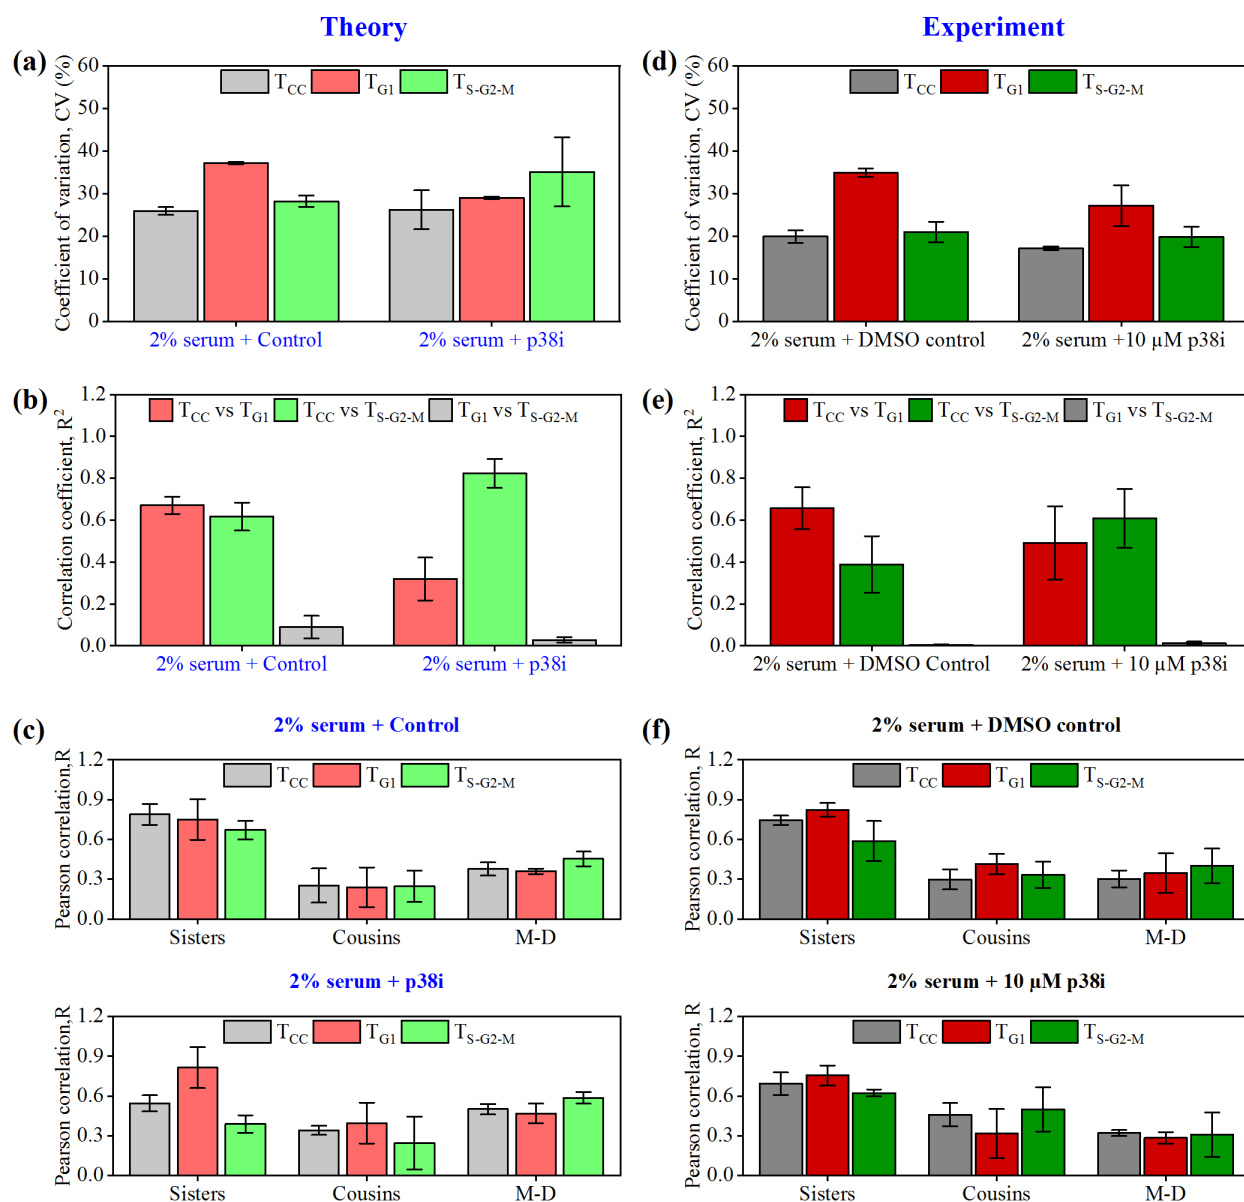

**Fig. 5. Inhibition of p38-signaling reduces the variability of the  $G_1$ -phase and reverses the correlation pattern under low (2%) serum conditions.** Numerically simulated 300 cells under only 2% serum (control) and 2% serum + p38-signaling inhibitor (10  $\mu$ M). **(a)** mean CV ( $\pm$  SD) of  $T_{CC}$ ,  $T_{G1}$ , and  $T_{S-G2-M}$  for all 3 numerical replicates, **(b)** mean Correlation coefficients ( $\pm$  SD) of  $T_{CC}$ ,  $T_{G1}$ , and  $T_{S-G2-M}$ , and **(c)** mean Pearson correlation ( $\pm$  SD) of  $T_{CC}$ ,  $T_{G1}$  and  $T_{S-G2-M}$  calculated from cell lineages for sisters, cousins, and mother-daughter pairs. Live-cell image analysis of nearly 300 FUCCI-HeLa cells at 2% serum (control) and 2% serum with 10  $\mu$ M p38-signaling inhibitor. **(d)** experimental mean CV ( $\pm$  SD) of  $T_{CC}$ ,  $T_{G1}$ , and  $T_{S-G2-M}$  for all 3 replicates, **(e)** experimental mean Correlation coefficients ( $\pm$  SD) of  $T_{CC}$ ,  $T_{G1}$ , and  $T_{S-G2-M}$ , and **(f)** experimental mean Pearson correlation ( $\pm$  SD) of  $T_{CC}$ ,  $T_{G1}$ , and  $T_{S-G2-M}$  calculated from cell lineages for sisters, cousins, and mother-daughter pairs.

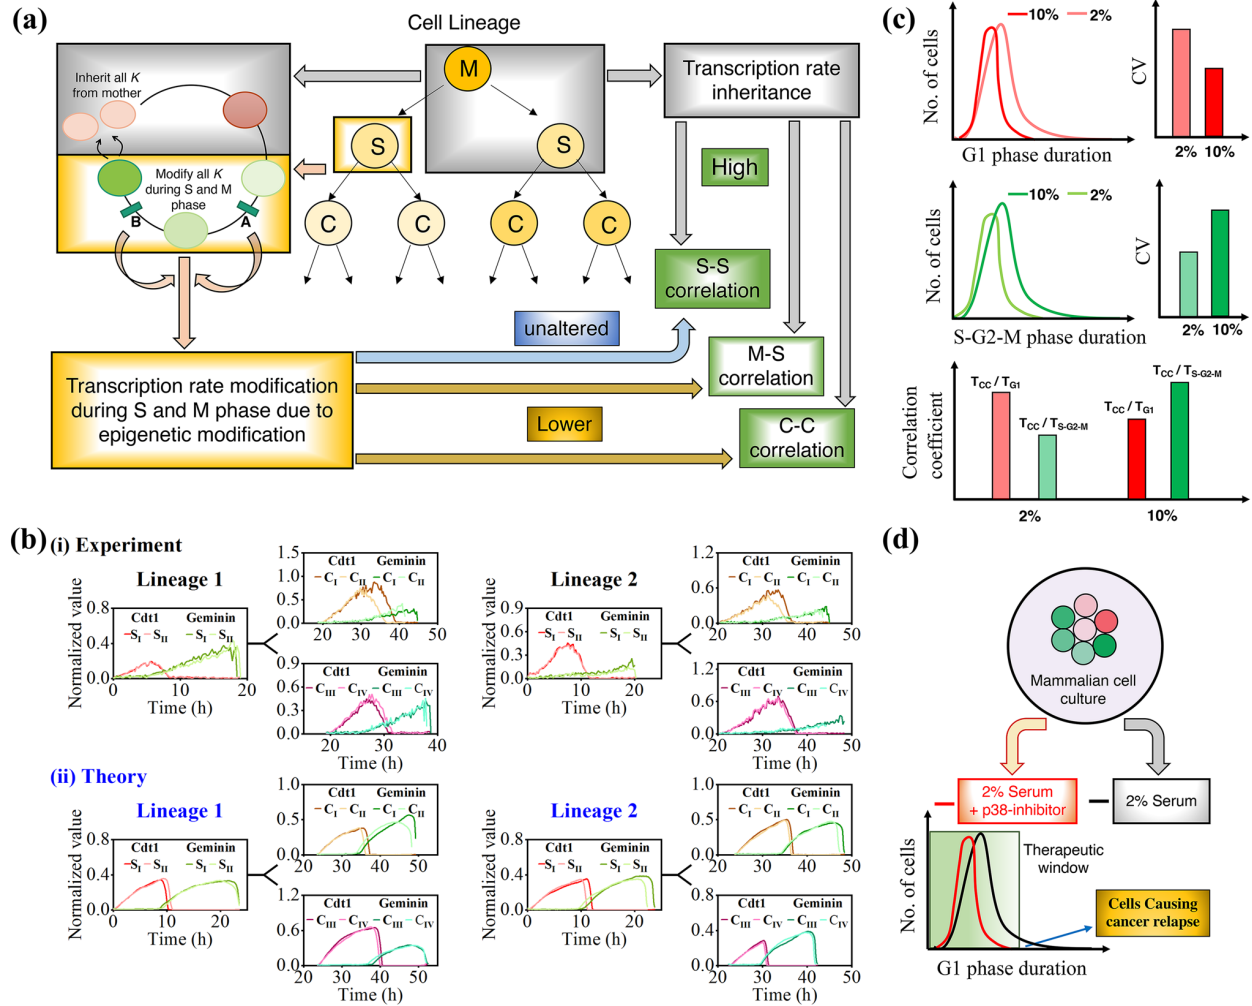

**Fig. 6. Transcription rate variation across cell lineages and during cell cycle phases govern the cell duration heterogeneities. (a)** Schematic depiction of how transcription rate variation across cell lineages and during cell cycle orchestrate the correlation of  $T_{CC}$ ,  $T_{G1}$ , and  $T_{S-G2-M}$  in sisters, cousins, and mother-daughter pairs. **(b)** Correlated transient dynamics of Cdt1 and Geminin during  $G_1$ -phase which often gets decorrelated during S and M-phases; **(i)** Experiment, and **(ii)** Theory. **(c)** Schematic depiction of the alteration in mean, SD, and CVs of the  $T_{G1}$  and  $T_{S-G2-M}$  due to serum doses and its effect on correlation patterns of  $T_{CC}$  vs  $T_{G1}$  and  $T_{CC}$  vs  $T_{S-G2-M}$ . **(d)** Inhibition of p38-signaling can lower the mean and variance of  $G_1$  phase duration even under low serum conditions.



| Model Type | Complete set of deterministic network interactions (Table S2) | Nature of Fluctuations |                                                                                                                                   |                                                         |                                                         |                                |                                  |
|------------|---------------------------------------------------------------|------------------------|-----------------------------------------------------------------------------------------------------------------------------------|---------------------------------------------------------|---------------------------------------------------------|--------------------------------|----------------------------------|
|            |                                                               | Intrinsic fluctuation  | Extrinsic fluctuations                                                                                                            |                                                         |                                                         |                                |                                  |
|            |                                                               |                        | Picking Transcription rates from the log-normal distributions (for each transcripts) for the starting mother cell in each lineage | Transcription rate variation for each cell (in S-phase) | Transcription rate variation for each cell (in M-phase) | Equal division of mother cells | Unequal division of mother cells |
| M-1        | ✓                                                             | ✓                      | ✓                                                                                                                                 | ✓                                                       | ✓                                                       | ×                              | ✓                                |
| M-2        | ✓                                                             | ✓                      | ×                                                                                                                                 | ×                                                       | ×                                                       | ×                              | ✓                                |
| M-3        | ✓                                                             | ×                      | ✓                                                                                                                                 | ×                                                       | ×                                                       | ×                              | ✓                                |
| M-4        | ✓                                                             | ×                      | ✓                                                                                                                                 | ✓                                                       | ✓                                                       | ×                              | ✓                                |
| M-5        | ✓                                                             | ✓                      | ✓                                                                                                                                 | ×                                                       | ×                                                       | ×                              | ✓                                |
| M-6        | ×                                                             | ✓                      | ✓                                                                                                                                 | ✓                                                       | ✓                                                       | ×                              | ✓                                |

**Table 1.** Different model variants are considered to unravel the contributions of various factors in controlling heterogeneities in  $T_{CC}$ ,  $T_{G1}$ , and  $T_{S-G2-M}$  for mammalian cells.
